# Supplementary material
Source: publisher figshare collection journal article supplement (https://sage.figshare.com/ndownloader/files/13170422)
Supplement: Supplementary file 1 [file 13170422]

## Distribution of ASD survey

### Pilot Results

**Table S1: Survey Respondents Membership of an Autism Support Group or Organization**

| <b>Families membership</b> | <b>N</b> | <b>%</b> | <b>Mean expenditure</b> | <b>Range</b>   |
|----------------------------|----------|----------|-------------------------|----------------|
| Yes                        | 19       | (67.9)   | €7143.29                | €240-19,053.52 |
| No                         | 9        | (32.1)   | €6730.42                | €480-14,760    |

### Mann Whitney Test Results

In order to see if there is a difference in total out-of-pocket expenditure between families who are members of an autism support group organization and those who are not, a Mann Whitney test is applied. The results suggest that there is no statistical difference in total out-of-pocket expenditure for group one, those who are not members of an ASD support group or organization and group two, those who are members ( $z = -0.025$ ;  $p = 0.9804$ ). This finding is important in terms of planning the distribution of the main national survey through autism groups and reducing possible sources of bias such as different expenditure patterns depending on whether a family is affiliated with an autism group or not.

**Figure S1: Health care services are delivered across 9 Community Healthcare Organisations in the Republic of Ireland**

**The nine Community Healthcare Organisations are outlined below:**

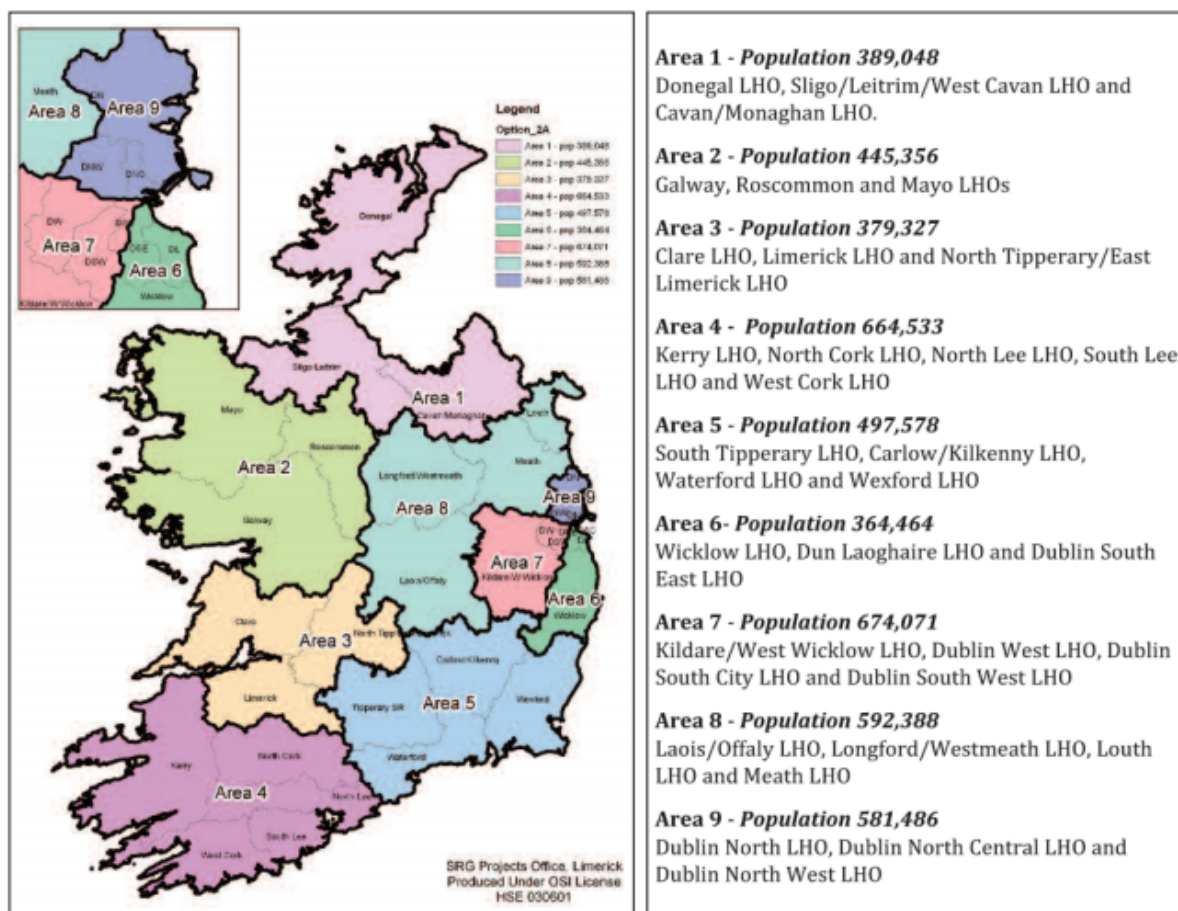

Source: HSE, (2014:17) *Community Healthcare Organisations – Report and Recommendations of the Integrated Service Area Review Group*  
Available from : <https://www.hse.ie/eng/services/publications/corporate/choreport.html>  
>accessed 11th June, 2018 (Internet)

**Table S2: Distribution of ASD survey**

| CHO area | County          | ASD prevalence for 2-18 years based on Census 2011 <sup>a</sup> | No. of surveys to be distributed randomly by Autism organizations | No. of children aged 2-18 years registered with autism organization <sup>b</sup> | Recruitment method of surveys returned       |                                       |                                 |                                     | Total number of surveys returned |
|----------|-----------------|-----------------------------------------------------------------|-------------------------------------------------------------------|----------------------------------------------------------------------------------|----------------------------------------------|---------------------------------------|---------------------------------|-------------------------------------|----------------------------------|
|          |                 |                                                                 |                                                                   |                                                                                  | Distributed randomly by autism organizations | Parent requested a postal /PDF survey | Parent downloaded survey online | Parent took a survey at Autism Expo |                                  |
| 1        | Cavan           | 186 (1.7%)                                                      | 17                                                                | 46                                                                               | 2                                            | 1                                     | 0                               | 1                                   | 4                                |
| 1        | Monaghan        | 148 (1.4%)                                                      | 14                                                                | 35                                                                               | 1                                            | 4                                     | 0                               | 0                                   | 5                                |
| 1        | Donegal         | 414 (3.9%)                                                      | 39                                                                | 107                                                                              | 3                                            | 2                                     | 0                               | 1                                   | 6                                |
| 1        | Sligo           | 146 (1.4%)                                                      | 14                                                                | 22                                                                               | 1                                            | 0                                     | 0                               | 0                                   | 1                                |
| 1        | Leitrim         | 74 (0.7%)                                                       | 7                                                                 | 8                                                                                | 1                                            | 1                                     | 0                               | 0                                   | 2                                |
| 2        | Galway          | 569 (5.4%)                                                      | 54                                                                | 72                                                                               | 6                                            | 9                                     | 0                               | 0                                   | 15                               |
| 2        | Mayo            | 305 (2.9%)                                                      | 29                                                                | 44                                                                               | 3                                            | 7                                     | 0                               | 0                                   | 10                               |
| 2        | Roscommon       | 149 (1.4%)                                                      | 14                                                                | 23                                                                               | 1                                            | 1                                     | 0                               | 0                                   | 2                                |
| 3        | Clare           | 251 (2.4%)                                                      | 24                                                                | 69                                                                               | 5                                            | 1                                     | 0                               | 0                                   | 6                                |
| 3        | Limerick        | 430 (4%)                                                        | 40                                                                | N/A                                                                              | 7                                            | 4                                     | 0                               | 0                                   | 11                               |
| 3        | North Tipperary | 170 (1.6%)                                                      | 16                                                                | 42*                                                                              | 3                                            | 3                                     | 0                               | 0                                   | 6                                |

Table S2: continued

| CHO Area | County            | ASD Prevalence For 2-18 years based on Census 2011 <sup>a</sup> | No. of Surveys to be distributed randomly | No. of children aged 2-18 years registered with autism organization <sup>b</sup> | Recruitment method of parental surveys returned |                                |                          |                                     | Total number of surveys returned |
|----------|-------------------|-----------------------------------------------------------------|-------------------------------------------|----------------------------------------------------------------------------------|-------------------------------------------------|--------------------------------|--------------------------|-------------------------------------|----------------------------------|
|          |                   |                                                                 |                                           |                                                                                  | Distributed randomly by autism organizations    | Requested a postal /PDF survey | Downloaded survey online | Parent took a survey at Autism Expo |                                  |
| 4        | Kerry             | 326 (3.1%)                                                      | 31                                        | N/A                                                                              | 2                                               | 5                              | 1                        | 0                                   | 8                                |
| 4        | Cork              | 1187 (11.2%)                                                    | 112                                       | N/A                                                                              | 8                                               | 6                              | 3                        | 0                                   | 17                               |
| 5        | Carlow            | 131 (1.2%)                                                      | 12                                        | 84                                                                               | 1                                               | 1                              | 0                        | 0                                   | 2                                |
| 5        | Kilkenny          | 232 (2.2%)                                                      | 22                                        | 39                                                                               | 2                                               | 2                              | 0                        | 0                                   | 4                                |
| 5        | Waterford         | 304 (2.9%)                                                      | 29                                        | N/A                                                                              | 0                                               | 0                              | 1                        | 0                                   | 1                                |
| 5        | Wexford           | 361 (3.4%)                                                      | 34                                        | 145                                                                              | 4                                               | 4                              | 2                        | 0                                   | 10                               |
| 5        | South Tipperary   | 224 (2.1%)                                                      | 21                                        | 42*                                                                              | 1                                               | 1                              | 0                        | 0                                   | 2                                |
| 6        | Dublin South East | 204 (1.9%)                                                      | 19                                        | 976*                                                                             | 1                                               | 0                              | 0                        | 0                                   | 1                                |
| 6        | Dun Laoighaire    | 271 (2.5%)                                                      | 25                                        | 976*                                                                             | 3                                               | 1                              | 0                        | 0                                   | 4                                |
| 6        | Wicklow           | 288 (2.7%)                                                      | 27                                        | 126*                                                                             | 2                                               | 2                              | 1                        | 0                                   | 5                                |
| 7        | Dublin South City | 217 (2%)                                                        | 20                                        | 976*                                                                             | 5                                               | 1                              | 0                        | 0                                   | 6                                |
| 7        | Dublin South West | 349 (3.3%)                                                      | 33                                        | 976*                                                                             | 2                                               | 4                              | 0                        | 0                                   | 6                                |

Table S2: Continued

| CHO Area     | County               | ASD Prevalence for 2-18 years based on Census 2011 <sup>a</sup> | No. of Surveys to be distributed randomly | Number of children aged 2-18 years registered with autism organization <sup>b</sup> | Recruitment method of surveys returned       |                                       |                                 |                                     | Total number of surveys returned |
|--------------|----------------------|-----------------------------------------------------------------|-------------------------------------------|-------------------------------------------------------------------------------------|----------------------------------------------|---------------------------------------|---------------------------------|-------------------------------------|----------------------------------|
|              |                      |                                                                 |                                           |                                                                                     | Distributed randomly by autism organizations | Parent requested a postal /PDF survey | Parent downloaded survey online | Parent took a survey at Autism Expo |                                  |
| 7            | Dublin West          | 353 (3.3%)                                                      | 33                                        | 976*                                                                                | 0                                            | 1                                     | 0                               | 0                                   | 1                                |
| 7            | Kildare/West Wicklow | 592 (5.6%)                                                      | 56                                        | 202*                                                                                | 5 (4/1)                                      | 4                                     | 2                               | 1                                   | 12 (11/1)                        |
| 8            | Laois                | 207 (1.9%)                                                      | 19                                        | 52                                                                                  | 3                                            | 0                                     | 0                               | 0                                   | 3                                |
| 8            | Offaly               | 196 (1.8%)                                                      | 18                                        | 89                                                                                  | 2                                            | 2                                     | 0                               | 0                                   | 4                                |
| 8            | Longford             | 98 (0.9%)                                                       | 9                                         | 17                                                                                  | 2                                            | 1                                     | 0                               | 0                                   | 3                                |
| 8            | Westmeath            | 213 (2%)                                                        | 20                                        | 71                                                                                  | 3                                            | 0                                     | 0                               | 1                                   | 4                                |
| 8            | Louth                | 304 (2.9%)                                                      | 29                                        | 72                                                                                  | 5                                            | 1                                     | 0                               | 0                                   | 6                                |
| 8            | Meath                | 495 (4.7%)                                                      | 47                                        | 193                                                                                 | 4                                            | 3                                     | 2                               | 0                                   | 9                                |
| 9            | Dublin North         | 578 (5.4%)                                                      | 54                                        | 976*                                                                                | 5                                            | 7                                     | 0                               | 0                                   | 12                               |
| 9            | Dublin NC            | 230 (2.2%)                                                      | 22                                        | 976*                                                                                | 3                                            | 0                                     | 0                               | 0                                   | 3                                |
| 9            | Dublin NW            | 430 (4%)                                                        | 40                                        | 976*                                                                                | 3                                            | 1                                     | 0                               | 0                                   | 4                                |
| <b>Total</b> | -                    | 10,632                                                          | 1,000                                     | N/A                                                                                 | 99                                           | 80                                    | 12                              | 4                                   | 195                              |

Note: Dochas randomly distributed the surveys in County Limerick, while Shine Ireland randomly distributed them in Cork, Kerry and Waterford because they had larger membership in those counties than the IAA. The IAA randomly distributed the surveys in all the remaining counties.

<sup>a</sup> Column 3 shows ASD prevalence calculated based on the assumption of 1 in 100 (Boilson et al., 2016). Results in parenthesis show the percentage of children with an ASD in each county/LHO with respect to the total population of children with an ASD.

<sup>b</sup> Column 5 presents information with regard to the number of children aged between 2 to 18 years of age registered with the three autism organizations based on the respective counties they distributed surveys to. In relation to the IAA, for the three counties divided between community health organization (CHO) areas i.e. Wicklow, Dublin and Tipperary the IAA provided the first author with the number of children per county. However, random distribution in these counties was broken down into the subsets listed i.e. Dublin North. N/A means the information was not available to the first author.

**Table S3: Descriptive Statistics of the Child and Adolescent Sample (n= 222) Stratified by Recruitment method**

| Characteristics                         | Recruitment method of surveys returned                |                                              |                                         |                                            |
|-----------------------------------------|-------------------------------------------------------|----------------------------------------------|-----------------------------------------|--------------------------------------------|
|                                         | Distributed randomly by autism organizations<br>N=113 | Parent requested a postal/PDF survey<br>N=90 | Parent downloaded survey online<br>N=15 | Parent took a survey at Autism Expo<br>N=4 |
| <b>Age</b>                              | 9.327 (2-18)                                          | 8.863(3-18)                                  | 9.13(4-16)                              | 8 (3-14)                                   |
| <b>Gender</b>                           |                                                       |                                              |                                         |                                            |
| Male                                    | 94 (83%)                                              | 73 (81%)                                     | 10 (67%)                                | 2 (50%)                                    |
| Female                                  | 19 (17%)                                              | 17 (19%)                                     | 5 (33%)                                 | 2 (50%)                                    |
| <b>Diagnosis</b>                        |                                                       |                                              |                                         |                                            |
| Autism Disorder                         | 84 (74%)                                              | 72 (80%)                                     | 11 (73%)                                | 4 (100%)                                   |
| Asperger's Disorder                     | 24 (21%)                                              | 14 (16%)                                     | 3 (20%)                                 | 0                                          |
| Childhood Disintegrative Disorder       | -                                                     | -                                            | -                                       | -                                          |
| Pervasive Developmental Disorder        | 3 (3%)                                                | 3 (3%)                                       | 1 (7%)                                  | -                                          |
| Retts Syndrome                          | -                                                     | -                                            | -                                       | -                                          |
| Not sure                                | 1 (1%)                                                | 1 (1%)                                       | -                                       | -                                          |
| Not answered                            | 1 (1%)                                                | -                                            | -                                       | -                                          |
| <b>ASD Severity</b>                     |                                                       |                                              |                                         |                                            |
| Level 3 (Severe)                        | 15 (13%)                                              | 11 (12%)                                     | 2 (13.3%)                               | 0                                          |
| Level 2 (Moderate)                      | 53 (47%)                                              | 25 (28%)                                     | 5 (33.3%)                               | 1 (25%)                                    |
| Level 1 (Mild)                          | 44 (39%)                                              | 32 (36%)                                     | 8 (53.3%)                               | -                                          |
| Not sure                                | -                                                     | 9 (10%)                                      | -                                       | 2 (50%)                                    |
| N/A                                     | -                                                     | 2 (2%)                                       | -                                       | -                                          |
| Not answered                            | 1 (1%)                                                | 11 (12%)                                     | -                                       | 1 (25%)                                    |
| <b>Child Verbal</b>                     |                                                       |                                              |                                         |                                            |
| Yes                                     | 88 (78%)                                              | 67 (74%)                                     | 11 (73%)                                | -                                          |
| No                                      | 25 (22%)                                              | 18 (20%)                                     | 3 (20%)                                 | -                                          |
| N/A                                     | -                                                     | 5 (6%)                                       | -                                       | 4 (100%)                                   |
| Not answered                            | -                                                     | -                                            | 1 (7%)                                  | -                                          |
| <b>Intellectual Disability</b>          |                                                       |                                              |                                         |                                            |
| Yes                                     | 63 (56%)                                              | 46 (51%)                                     | 6 (40%)                                 | 3 (75%)                                    |
| No                                      | 50 (44%)                                              | 43 (48%)                                     | 9 (60%)                                 | -                                          |
| Don't know                              | -                                                     | 1 (1%)                                       | -                                       | 1 (25%)                                    |
| <b>Intellectual Disability Severity</b> |                                                       |                                              |                                         |                                            |
| Mild                                    | 22 (35%)                                              | 23 (49%)                                     | 4 (67%)                                 | -                                          |
| Moderate                                | 30 (48%)                                              | 17 (36%)                                     | 2 (33%)                                 | 3 (75%)                                    |
| Severe                                  | 10 (16%)                                              | 6 (13%)                                      | -                                       | -                                          |
| Profound                                | 1 (2%)                                                | -                                            | -                                       | -                                          |
| Not Sure                                | -                                                     | 1 (2%)                                       | -                                       | 1 (25%)                                    |
| <b>Comorbidities</b>                    |                                                       |                                              |                                         |                                            |
| Yes                                     | 85 (75%)                                              | 27 (30%)                                     | 7 (47%)                                 | 1 (25%)                                    |
| No                                      | 25 (22%)                                              | 55 (61%)                                     | 7 (47%)                                 | 2 (50%)                                    |
| Refusal                                 | 3 (3%)                                                | 7 (8%)                                       | 1 (6%)                                  | 1 (25%)                                    |
| Not sure                                | -                                                     | 1 (1%)                                       | -                                       | -                                          |
| <b>Medical Card</b>                     |                                                       |                                              |                                         |                                            |
| Yes                                     | 58 (51%)                                              | 47 (52%)                                     | 6 (40%)                                 | 1 (25%)                                    |
| No                                      | 42 (37%)                                              | 35 (40%)                                     | 8 (53%)                                 | 2 (50%)                                    |
| N/A                                     | 1 (1%)                                                | 4 (4%)                                       | -                                       | -                                          |
| Refusal                                 | 12 (11%)                                              | 4 (4%)                                       | 1 (7%)                                  | 1 (25%)                                    |

Note: No age was provided for 2 of the children. However, both were attending schools that taught children within the age range for the study, so they were included. Discrepancies exist in the figures for "Diagnosis" and "ASD Severity" based on when the child was diagnosed and whether they had received an updated diagnosis of their severity level since DSM-5 diagnostic criteria was introduced.

**Table S4: Descriptive Statistics of the Parents' Sample (n=195)**

| Characteristics                                              | Recruitment method of surveys returned              |                                             |                                        |                                           |
|--------------------------------------------------------------|-----------------------------------------------------|---------------------------------------------|----------------------------------------|-------------------------------------------|
|                                                              | Distributed randomly by autism organizations (N=99) | Parent requested a postal/PDF survey (N=80) | Parent downloaded survey online (N=12) | Parent took a survey at Autism Expo (N=4) |
| <b>Mothers Age<sup>a</sup></b>                               | 42.33 (94)                                          | 41.46 (79)                                  | 40.25 (12)                             | 37.5 (2)                                  |
| <b>Mothers Age Range</b>                                     | 22-57                                               | 24-54                                       | 32-56                                  | 34-41                                     |
| <b>Fathers Age*</b>                                          | 44.41 (79)                                          | 45.04 (69)                                  | 44.18 (11)                             | 35 (2)                                    |
| <b>Fathers Age Range</b>                                     | 24-64                                               | 32-66                                       | 34-69                                  | 31-39                                     |
| <b>Marital Status</b>                                        |                                                     |                                             |                                        |                                           |
| Married                                                      | 77 (77.7%)                                          | 64 (80%)                                    | 10 (83.3%)                             | 3 (75%)                                   |
| Partner                                                      | 3 (3%)                                              | 5 (6%)                                      | 1 (8.33%)                              | 1 (25%)                                   |
| Single                                                       | 11 (11.1%)                                          | 8 (10%)                                     | -                                      | -                                         |
| Widow                                                        | -                                                   | -                                           | -                                      | -                                         |
| Separated                                                    | 7 (7.1%)                                            | 2 (3%)                                      | 1 (8.33%)                              | -                                         |
| Divorced                                                     | 1 (1%)                                              | 1 (1%)                                      | -                                      | -                                         |
| <b>Mothers Education Completed</b>                           |                                                     |                                             |                                        |                                           |
| Primary school                                               | 2 (2%)                                              | -                                           | -                                      | -                                         |
| Junior Cert or Equivalent                                    | 7 (7.1%)                                            | 4 (5%)                                      | -                                      | -                                         |
| Leaving Cert or Equivalent                                   | 24 (24.3%)                                          | 18 (23%)                                    | 1 (8%)                                 | -                                         |
| Third Level                                                  | 43 (43.4%)                                          | 33 (41%)                                    | 4 (33%)                                | 4 (100%)                                  |
| Postgraduate                                                 | 22 (22.2%)                                          | 18 (23%)                                    | 5 (42%)                                | -                                         |
| Other                                                        | 1 (1%)                                              | 7 (8%)                                      | 2 (17%)                                | -                                         |
| <b>Fathers Education Completed</b>                           |                                                     |                                             |                                        |                                           |
| Primary school                                               | 2 (2%)                                              | -                                           | -                                      | -                                         |
| Junior Cert or Equivalent                                    | 16 (16.2%)                                          | 11 (13.8%)                                  | 5 (42%)                                | -                                         |
| Leaving Cert or Equivalent                                   | 13 (13.1%)                                          | 16 (20%)                                    | 2 (17%)                                | 25%                                       |
| Third Level                                                  | 29 (29.3%)                                          | 27 (33.7%)                                  | 2 (17%)                                | 50%                                       |
| Postgraduate                                                 | 18 (18.2%)                                          | 11 (13.7%)                                  | 1 (8%)                                 | 25%                                       |
| Other                                                        | 2 (2%)                                              | 3 (3.7%)                                    | 1 (8%)                                 | -                                         |
| N/A                                                          | 17 (17.2%)                                          | 1 (1.3%)                                    | -                                      | -                                         |
| Refusal                                                      | 2 (2%)                                              | 11 (13.8%)                                  | 1 (8%)                                 | -                                         |
| <b>Mothers Current Work Status</b>                           |                                                     |                                             |                                        |                                           |
| Working Full-time                                            | 17 (17.2%)                                          | 10 (12.5%)                                  | 4 (33%)                                | 1 (25%)                                   |
| Working Part-time                                            | 17 (17.2%)                                          | 12 (15%)                                    | 2 (17%)                                | -                                         |
| Unemployed                                                   | 3 (3%)                                              | 2 (2.5%)                                    | -                                      | -                                         |
| Home Duties/ Looking After Home or Family                    | 8 (8.1%)                                            | 10 (12.5%)                                  | 1 (8%)                                 | -                                         |
| Long-term sickness or disability                             | 2 (2%)                                              | 1 (1.2%)                                    | -                                      | -                                         |
| Full-time student                                            | 1 (1%)                                              | 1 (1.2%)                                    | -                                      | -                                         |
| Full-time Carer to Child/Children with an ASD                | 49 (49.5%)                                          | 44 (55%)                                    | 5 (42%)                                | 3 (75%)                                   |
| Full-time carer to someone other than your child with an ASD | 1 (1%)                                              | -                                           | -                                      | -                                         |
| Other                                                        | 1 (1%)                                              | -                                           | -                                      | -                                         |

Table S4: Continued

| Characteristics                                              | Recruitment method of surveys returned              |                                             |                                        |                                           |
|--------------------------------------------------------------|-----------------------------------------------------|---------------------------------------------|----------------------------------------|-------------------------------------------|
|                                                              | Distributed randomly by autism organizations (N=99) | Parent requested a postal/PDF survey (N=80) | Parent downloaded survey online (N=12) | Parent took a survey at Autism Expo (N=4) |
| <b>Fathers Current Work Status</b>                           |                                                     |                                             |                                        |                                           |
| Working Full-time                                            | 58 (59%)                                            | 51 (64%)                                    | 8 (67%)                                | 4 (100%)                                  |
| Working Part-time                                            | 6 (6%)                                              | 4 (5%)                                      | -                                      | -                                         |
| Unemployed                                                   | 2 (2%)                                              | 8 (10%)                                     | -                                      | -                                         |
| Home Duties/ Looking After Home or Family                    | 1 (1%)                                              | -                                           | -                                      | -                                         |
| Long-term sickness or disability                             | 3 (3%)                                              | 1 (1%)                                      | -                                      | -                                         |
| Full-time student                                            | -                                                   | -                                           | -                                      | -                                         |
| Full-time Carer to Child/Children with an ASD                | 4 (4%)                                              | 2 (2.5%)                                    | 2 (17%)                                | -                                         |
| Full-time carer to someone other than your child with an ASD | 1 (1%)                                              | -                                           | -                                      | -                                         |
| Other                                                        | 5 (5%)                                              | 4 (5%)                                      | 1 (8%)                                 | -                                         |
| N/A                                                          | 17 (17%)                                            | -                                           | -                                      | -                                         |
| Refusal                                                      | 2 (2%)                                              | 10 (12.5%)                                  | 1 (8%)                                 | -                                         |
| <b>Household number</b>                                      | 4.35 (2-11)                                         | 4.24 (2-10)                                 | 4.42 (3-7)                             | 4.5 (4-5)                                 |
| <b>Household Income<sup>b</sup></b>                          | 44,911.31(66)                                       | 46,277.42 (52)                              | 52,831.80 (10)                         | 39,790 (2)                                |
| <b>Household Income Ranges</b>                               | 8,000-100,000                                       | 6,000 – 100,000                             | 35,456-103,000                         | 16,900-62,680                             |

<sup>a</sup> 8 mothers refused to report their age. The figures in parenthesis represent the number who reported their age.

<sup>b</sup> Only 130 out of 195 families reported their household income



**Table S5: Out-Of-Pocket Expenditure Reported Per Family Stratified by Recruitment Method For the Past 12 Months Due to Having a Child or Children with an Autism Spectrum Disorder, N=195**

| Type of Expenses                        | Recruitment method of surveys returned              |             |                                             |             |                                        |             |                                           |             |
|-----------------------------------------|-----------------------------------------------------|-------------|---------------------------------------------|-------------|----------------------------------------|-------------|-------------------------------------------|-------------|
|                                         | Distributed randomly by autism organizations (N=99) |             | Parent requested a postal/PDF survey (N=80) |             | Parent downloaded survey online (N=12) |             | Parent took a survey at Autism Expo (N=4) |             |
|                                         | Mean Cost                                           | Median Cost | Mean Cost                                   | Median Cost | Mean Cost                              | Median Cost | Mean Cost                                 | Median Cost |
| <b>Living Costs</b>                     | €3,481.90                                           | €2,000      | €2,015.75                                   | €1,470      | €2,957.17                              | €1,590      | €925.62                                   | €402        |
|                                         | €0- 23,920                                          |             | €0-13,000                                   |             | €150-12,320                            |             | €0-2,898.47                               |             |
| Special diet                            | € 1,012.93                                          | €520        | €668.66                                     | €0          | €1,910                                 | €780        | € 594.62                                  | €0          |
|                                         | €0-11,440                                           |             | €0-3,840                                    |             | €0- 7,800                              |             | €0- 2,378.47                              |             |
| Special clothing                        | €300.56                                             | €0          | € 150.31                                    | €0          | € 116.67                               | €0          | €0                                        | €0          |
|                                         | €0-2400                                             |             | €0-1,560                                    |             | €0-1,200                               |             | €0                                        |             |
| Continence care e.g. nappies            | €162.97                                             | €0          | €145.60                                     | €0          | €138                                   | €0          | €186                                      | €0          |
|                                         | €0-1200                                             |             | €0-1,680                                    |             | €0-936                                 |             | €0-744                                    |             |
| Replacing/repairing damage              | €725.91                                             | €240        | €327.3                                      | €0          | €249.17                                | €75         | €15                                       | €0          |
|                                         | €0-10,400                                           |             | €0-3000                                     |             | €0-1,000                               |             | €0-60                                     |             |
| Extra heat                              | €342.42                                             | €0          | €170.95                                     | €0          | €108.33                                | €0          | €0                                        | €0          |
|                                         | €0- 3,640                                           |             | €0-1,560                                    |             | €0- 600                                |             | €0                                        |             |
| Extra electricity                       | €428.16                                             | €0          | €225.2                                      | €0          | € 111.67                               | €0          | € 130                                     | €0          |
|                                         | €0- 3,640                                           |             | €0-1560                                     |             | €0- 600                                |             | €0-520                                    |             |
| Laundry                                 | €247.43                                             | €0          | €211.1                                      | €0          | €121.67                                | €0          | €0                                        | €0          |
|                                         | €0-2600                                             |             | €0-2,600                                    |             | €0- 720                                |             | €0                                        |             |
| Telephone                               | € 261.52                                            | €0          | €116.63                                     | €0          | €201.67                                | €0          | €0                                        | €0          |
|                                         | €0-2,600                                            |             | €0- 1,680                                   |             | €0- 720                                |             | €0                                        |             |
| <b>Care and Assistance</b>              | €1,918.03                                           | €3504.11    | € 1,123.90                                  | €0          | € 1700.83                              | €200        | €1,200                                    | €0          |
|                                         | €0-15,600                                           |             | €0- 23,400                                  |             | €0-10,700                              |             | €0-4,800                                  |             |
| Childcare/carers during the school term | €1245.14                                            | €0          | € 744.2                                     | €0          | € 1,016.67                             | €0          | € 1200                                    | €0          |
|                                         | €0- 11,100                                          |             | €0- 15,750                                  |             | €0- 5,600                              |             | €0- 4,800                                 |             |
| Childcare/carers during the holidays    | €573.37                                             | €0          | €306.7                                      | €0          | €659.17                                | €0          | €0                                        | €0          |
|                                         | €0- 4,500                                           |             | €0- 7,650                                   |             | €0- 5,100                              |             | €0                                        |             |
| Respite care                            | €99.52                                              | €0          | €73                                         | €0          | €25                                    | €0          | €0                                        | €0          |
|                                         | €0- 2400                                            |             | €0- 4800                                    |             | €0-300                                 |             | €0                                        |             |

Table S5: Continued

| Type of Expenses                                                          | Recruitment method of surveys returned              |             |                                             |             |                                        |             |                                           |             |
|---------------------------------------------------------------------------|-----------------------------------------------------|-------------|---------------------------------------------|-------------|----------------------------------------|-------------|-------------------------------------------|-------------|
|                                                                           | Distributed randomly by autism organizations (N=99) |             | Parent requested a postal/PDF survey (N=80) |             | Parent downloaded survey online (N=12) |             | Parent took a survey at Autism Expo (N=4) |             |
|                                                                           | Mean Cost                                           | Median Cost | Mean Cost                                   | Median Cost | Mean Cost                              | Median Cost | Mean Cost                                 | Median Cost |
| <b>Special Activities</b>                                                 |                                                     |             |                                             |             |                                        |             |                                           |             |
| Autism friendly activities                                                | €999.72<br>€0-10,400                                | €780        | €578.64<br>€0- 2880                         | €360        | € 446.67<br>€0-1,500                   | €300        | €240<br>€0-720                            | €120        |
| <b>Educational Costs</b>                                                  | €974.83<br>€0-8,320                                 | €500        | € 986.54<br>€0-6,200                        | €680        | €1,469.5<br>€0- 7,040                  | €650        | € 2,625.19<br>€0-10,438.75                | €31         |
| Specialised education                                                     | € 220.81<br>€0- 7,800                               | €0          | € 247.2<br>€0- 4,750                        | €0          | €866.67<br>€0- 6,240                   | €0          | € 648<br>€0-2,592                         | €0          |
| Therapeutic toys & sensory equipment                                      | €370.40<br>€0- 5,200                                | €200        | € 332.42<br>€0-2000                         | €200        | € 259.58<br>€0- 685                    | €175        | €1977.19<br>€0-7,846.75                   | €31         |
| Electronic items e.g. iPad                                                | €383.62<br>€0- 4,500                                | €260        | € 406.93<br>€0- 3,450                       | €279.50     | €343.25<br>€0-1,000                    | €230        | €0<br>€0                                  | €0          |
| <b>Medical Costs</b>                                                      | €2,113.60<br>€0- 17,140                             | €1,180      | €1,380.19<br>€0-9,152                       | €820        | €2,715.42<br>€270- 8,085               | €905        | €1,442.08<br>€0-5,000                     | €384.15     |
| Out-of-pocket expenses for GP visit                                       | €169.39<br>€0- 2,880                                | €0          | €107.78<br>€0-750                           | €0          | €103.75<br>€0-495                      | €0          | €0<br>€0                                  | €0          |
| Out-of-pocket for specialists                                             | €525.28<br>€0- 10,400                               | €0          | € 220.33<br>€0- 2,250                       | €0          | €280<br>€0- 1,890                      | €150        | €1,152.5<br>€0-4,000                      | €305        |
| Out-of-pocket expenses for medication/supplements                         | €297.71<br>€0-7,200                                 | €0          | €278.07<br>€0-3000                          | €55         | € 675.83<br>€0- 5,750                  | €60         | € 14.58<br>€0- 58.30                      | €0          |
| Out-of-pocket expenses for private therapeutic interventions & assessment | €1,047.17<br>€0- 14,400                             | €500        | €754.01<br>€ 0-8,320                        | €20         | € 1,655.83<br>€0- 5,700                | €240        | €250<br>€0- 1,000                         | €0          |
| Out-of-pocket expenses for hospital patient fee                           | €74.04<br>€0- 3,000                                 | €0          | €20<br>€0-300                               | €0          | €0<br>€0                               | €0          | €25<br>€0-100                             | €0          |

Table: S5 Continued

| Type of Expenses                    | Recruitment method of surveys returned              |             |                                             |             |                                        |             |                                           |             |
|-------------------------------------|-----------------------------------------------------|-------------|---------------------------------------------|-------------|----------------------------------------|-------------|-------------------------------------------|-------------|
|                                     | Distributed randomly by autism organizations (N=99) |             | Parent requested a postal/PDF survey (N=80) |             | Parent downloaded survey online (N=12) |             | Parent took a survey at Autism Expo (N=4) |             |
|                                     | Mean Cost                                           | Median Cost | Mean Cost                                   | Median Cost | Mean Cost                              | Median Cost | Mean Cost                                 | Median Cost |
| <b>Travel Costs</b>                 | €995.72                                             | €520        | €586.94                                     | €100        | €1,845.33                              | €1,730      | €687.50                                   | €75         |
|                                     | €0-4,800                                            |             | €0-4,680                                    |             | €0-4,524                               |             | €0-2,600                                  |             |
| Fuel/transport/parking costs        | €957.84                                             | €500        | €555.06                                     | €100        | €1,812                                 | €1,530      | €687.5                                    | €75         |
|                                     | €0-4,800                                            |             | €0-4,680                                    |             | €0-4,524                               |             | €0-2,600                                  |             |
| Accommodation                       | €37.88                                              | €0          | €31.88                                      | €0          | €33.33                                 | €0          | €0                                        | €0          |
|                                     | €0-1,200                                            |             | €0-1,700                                    |             | €0-300                                 |             | €0                                        |             |
| <b>Training/Support Costs</b>       | €408.59                                             | €0          | €198.81                                     | €0          | €128.33                                | €0          | €12.5                                     | €0          |
|                                     | €0-9,600                                            |             | €0-2,400                                    |             | €0-1,440                               |             | €0-50                                     |             |
| Skills training course(s)/workshops | €238.28                                             | €0          | €139.19                                     | €0          | €8.33                                  | €0          | €12.5                                     | €0          |
|                                     | €0-9,600                                            |             | €0-1,440                                    |             | €0-100                                 |             | €0-50                                     |             |
| Counselling                         | €170.30                                             | €0          | €59.63                                      | €0          | €120                                   | €0          | €0                                        | €0          |
|                                     | €0-4,320                                            |             | €0-2,400                                    |             | €0-1,440                               |             | €0                                        |             |
| <b>Autism Assistance Dog</b>        |                                                     |             |                                             |             |                                        |             |                                           |             |
| Training/veterinary bills/feeding   | €124.75                                             | €0          | €157.5                                      | €0          | €20                                    | €0          | €567                                      | €0          |
|                                     | €0-6,700                                            |             | €0-2,700                                    |             | €0-240                                 |             | €0-2,268                                  |             |
| <b>Other</b>                        | €260.30                                             | €0          | €66.63                                      | €0          | €18.17                                 | €0          | €0                                        | €0          |
|                                     | €0-4,800                                            |             | €0-1,560                                    |             | €0-218                                 |             | €0                                        |             |
| <b>Total Out-Pocket Expenditure</b> | €11,277.42                                          | €8,636      | €7,094.89                                   | €5,020      | €11,301.42                             | €9,500      | €7,699.88                                 | €5,753      |
|                                     | €600-56,160                                         |             | €0-41,756                                   |             | €2,226-25,811                          |             | €240-19,053.52                            |             |

**Table S6: Out-Of-Pocket Expenditure Reported Per Child Stratified by Recruitment Method For the Past 12 Months Due to Having a Child or Children with an Autism Spectrum Disorder, N=222**

| Type of Expenses                        | Recruitment method of surveys returned               |             |                                             |             |                                        |             |                                           |             |
|-----------------------------------------|------------------------------------------------------|-------------|---------------------------------------------|-------------|----------------------------------------|-------------|-------------------------------------------|-------------|
|                                         | Distributed randomly by autism organizations (N=113) |             | Parent requested a postal/PDF survey (N=90) |             | Parent downloaded survey online (N=15) |             | Parent took a survey at Autism Expo (N=4) |             |
|                                         | Mean Cost                                            | Median Cost | Mean Cost                                   | Median Cost | Mean Cost                              | Median Cost | Mean Cost                                 | Median Cost |
| <b>Living Costs</b>                     | €4,125.58                                            | €2,560      | €2,322.78                                   | €1,620      | €4,456.4                               | €2,900      | €925.62                                   | €402        |
|                                         | €0- 23,920                                           |             | €0-13,000                                   |             | €150-12,320                            |             | €0- 2,898.47                              |             |
| Special diet                            | €839.65                                              | €520        | €577.37                                     | €97.50      | €1,528                                 | €1,560      | €594.62                                   | €0          |
|                                         | €0-4,800                                             |             | €0-3,840                                    |             | €0-3,000                               |             | €0-2,378.47                               |             |
| Special clothing                        | €260.66                                              | €0          | €133.61                                     | €0          | €93.33                                 | €0          | €0                                        | €0          |
|                                         | €0- 2,400                                            |             | €0-1,200                                    |             | €0-400                                 |             | €0                                        |             |
| Continence care e.g. nappies            | €142.78                                              | €0          | €129.42                                     | €0          | €110.4                                 | €0          | €186                                      | €0          |
|                                         | €0-1,200                                             |             | €0- 1,300                                   |             | €0-936                                 |             | €0-744                                    |             |
| Replacing/repairing damage              | € 568.27                                             | €240        | €280.49                                     | €0          | €199.33                                | €150        | €15                                       | €0          |
|                                         | €0- 10,400                                           |             | €0-3000                                     |             | €0-600                                 |             | €0- 60                                    |             |
| Extra heat                              | €289.38                                              | €0          | €151.96                                     | €0          | €86.67                                 | €0          | €0                                        | €0          |
|                                         | €0-3,640                                             |             | €0-1,560                                    |             | €0-600                                 |             | €0                                        |             |
| Extra electricity                       | €360.25                                              | €200        | €200.18                                     | €0          | €89.33                                 | €0          | €130                                      | €0          |
|                                         | €0-3,640                                             |             | €0-1,440                                    |             | €0-600                                 |             | €0-520                                    |             |
| Laundry                                 | €206.16                                              | €0          | €187.64                                     | €0          | €97.33                                 | €0          | €0                                        | €0          |
|                                         | €0-1,500                                             |             | €0- 2,600                                   |             | €0-720                                 |             | €0                                        |             |
| Telephone                               | €221.95                                              | €0          | €103.67                                     | €0          | €161.33                                | €0          | €0                                        | €0          |
|                                         | €0-2,600                                             |             | €0-1300                                     |             | €0-720                                 |             | €0                                        |             |
| <b>Care and Assistance</b>              | €1,593.32                                            | €0          | €999.02                                     | €0          | €1,360.67                              | €133.33     | €1,200                                    | €0          |
|                                         | €0-15,600                                            |             | €0- 23,400                                  |             | €0- 10,700                             |             | €0- 4,800                                 |             |
| Childcare/carers during the school term | €1,028.49                                            | €0          | €661.51                                     | €0          | €813.33                                | €0          | €1,200                                    | €0          |
|                                         | €0-11,100                                            |             | €0-15,750                                   |             | €0-5,600                               |             | €0-4,800                                  |             |
| Childcare/carers during the holidays    | €486.85                                              | €0          | €272.62                                     | €0          | €527.33                                | €133.33     | €0                                        | €0          |
|                                         | €0-4,500                                             |             | €0-7,650                                    |             | €0-5,100                               |             | €0                                        |             |
| Respite care                            | €77.98                                               | €0          | €64.89                                      | €0          | €20                                    | €0          | €0                                        | €0          |
|                                         | €0-2,400                                             |             | €0- 2,400                                   |             | €0-150                                 |             | €0                                        |             |

Table S6: Continued

| Type of Expenses                                                          | Recruitment method of surveys returned               |             |                                             |             |                                        |             |                                           |             |
|---------------------------------------------------------------------------|------------------------------------------------------|-------------|---------------------------------------------|-------------|----------------------------------------|-------------|-------------------------------------------|-------------|
|                                                                           | Distributed randomly by autism organizations (N=113) |             | Parent requested a postal/PDF survey (N=90) |             | Parent downloaded survey online (N=15) |             | Parent took a survey at Autism Expo (N=4) |             |
|                                                                           | Mean Cost                                            | Median Cost | Mean Cost                                   | Median Cost | Mean Cost                              | Median Cost | Mean Cost                                 | Median Cost |
| <b>Special Activities</b>                                                 |                                                      |             |                                             |             |                                        |             |                                           |             |
| Autism friendly activities                                                | € 870.55<br>€0- 10,400                               | €600        | €514.34<br>€0- 2,640                        | €347.5      | €357.33<br>€0-1,240                    | €300        | €240<br>€0-720                            | €120        |
| <b>Educational Costs</b>                                                  | €842.28<br>€0- 6,100                                 | €480        | €863.59<br>€0- 4,750                        | €700        | €1,175.6<br>€0- 7,040                  | €900        | €2,625.19<br>€0-10,438.75                 | €31         |
| Specialised education                                                     | €193.45<br>€0- 3,900                                 | €0          | €219.73<br>€0- 4,750                        | €0          | €693.33<br>€0- 6,240                   | €300        | €648<br>€0-2,592                          | €0          |
| Therapeutic toys & sensory equipment                                      | €313.89<br>€0-5,200                                  | €130        | €282.15<br>€0- 1,800                        | €200        | €207.67<br>€0-600                      | €200        | €1,977.19<br>€0- 7,846.75                 | €31         |
| Electronic items e.g. iPad                                                | €334.94<br>€0- 4,500                                 | €250        | €361.71<br>€0- 3,450                        | €300        | €274.6<br>€0-900                       | €244.5      | €0<br>€0                                  | €0          |
| <b>Medical Costs</b>                                                      | €1,834.74<br>€0- 14,800                              | €930        | €1222.72<br>€0-9,152                        | €668        | €2,172.33<br>€183.33-6,950             | €770        | €1,442.08<br>€0- 5,000                    | €384.15     |
| Out-of-pocket expenses for GP visit                                       | €148.41<br>€0-2,880                                  | €0          | €94.47<br>€0-750                            | €0          | €83<br>€0-400                          | €0          | €0<br>€0                                  | €0          |
| Out-of-pocket for specialists                                             | €460.20<br>€0-10,400                                 | €0          | €199.18<br>€0- 2,250                        | €0          | €224<br>€0-945                         | €83.33      | €1,152.5<br>€0-4,000                      | €305        |
| Out-of-pocket expenses for medication/supplements                         | €254.45<br>€0- 7,200                                 | €40         | €245.51<br>€0-3,000                         | €40         | €540.67<br>€0-5,750                    | €100        | €14.58<br>€0-58.3                         | €0          |
| Out-of-pocket expenses for private therapeutic interventions & assessment | €906.81<br>€0-7,500                                  | €150        | €666.34<br>€0- 8,320                        | €159        | €1,324.67<br>€0-5,500                  | €150        | €250<br>€0-1000                           | €0          |
| Out-of-pocket expenses for hospital patient fee                           | €64.87<br>€0- 3,000                                  | €0          | €17.22<br>€0- 300                           | €0          | €0<br>€0                               | €0          | €25<br>€0-100                             | €0          |

Table S6: Continued

| Type of Expenses                    | Recruitment method of surveys returned               |             |                                             |             |                                        |             |                                           |             |
|-------------------------------------|------------------------------------------------------|-------------|---------------------------------------------|-------------|----------------------------------------|-------------|-------------------------------------------|-------------|
|                                     | Distributed randomly by autism organizations (N=113) |             | Parent requested a postal/PDF survey (N=90) |             | Parent downloaded survey online (N=15) |             | Parent took a survey at Autism Expo (N=4) |             |
|                                     | Mean Cost                                            | Median Cost | Mean Cost                                   | Median Cost | Mean Cost                              | Median Cost | Mean Cost                                 | Median Cost |
| <b>Travel Costs</b>                 | €867.75                                              | €520        | €521.72                                     | €150        | €1,476.27                              | €1,000      | €687.5                                    | €75         |
|                                     | €0-4,800                                             |             | €0-3,995                                    |             | €0-4320                                |             | €0-2,600                                  |             |
| Fuel/transport/parking costs        | €834.57                                              | €500        | €493.39                                     | €135        | €1,449.6                               | €1,000      | €687.5                                    | €75         |
|                                     | €0-4,800                                             |             | €0- 3,845                                   |             | €0- 4,320                              |             | €0-2,600                                  |             |
| Accommodation                       | €33.19                                               | €0          | €28.33                                      | €0          | €26.67                                 | €0          | €0                                        | €0          |
|                                     | €0-1,200                                             |             | €0- 1,700                                   |             | €0- 300                                |             | €0                                        |             |
| <b>Training/Support Costs</b>       | €384.87                                              | €0          | €176.72                                     | €0          | €102.67                                | €0          | €12.5                                     | €0          |
|                                     | €0- 9,600                                            |             | €0- 2,400                                   |             | €0-720                                 |             | €0- 50                                    |             |
| Skills training course(s)/workshops | €235.66                                              | €0          | €123.72                                     | €0          | €6.67                                  | €0          | €12.5                                     | €0          |
|                                     | €0-9,600                                             |             | €0- 1,400                                   |             | €0-100                                 |             | €0-50                                     |             |
| Counselling                         | €149.20                                              | €0          | €53                                         | €0          | €96                                    | €0          | €0                                        | €0          |
|                                     | €0-4,320                                             |             | €0-2,400                                    |             | €0-720                                 |             | €0                                        |             |
| <b>Autism Assistance Dog</b>        |                                                      |             |                                             |             |                                        |             |                                           |             |
| Training/veterinary bills/feeding   | €109.29                                              | €0          | €140                                        | €0          | €16                                    | €0          | €567                                      | €0          |
|                                     | €0- 6,700                                            |             | €0-2,700                                    |             | €0-240                                 |             | €0-2,268                                  |             |
| <b>Other</b>                        | €228.05                                              | €0          | €59.22                                      | €0          | €14.53                                 | €0          | €0                                        | €0          |
|                                     | €0- 4,680                                            |             | €0- 1,450                                   |             | €0-109                                 |             | €0                                        |             |
| <b>Total Out-Pocket Expenditure</b> | € 12,539.57                                          | €9,080      | €8,218.53                                   | €5,408      | €13,664.53                             | €12,180     | €7,699.88                                 | €5,753      |
|                                     | €270- 56,160                                         |             | €0- 41,756                                  |             | €2,226-25,811                          |             | € 240-19,053.52                           |             |

**Table S7: Utilization of State Provided Public Health Services Per Child Used in the Past 12 Months**

|                                        | Recruitment method of surveys returned               |                                 |                                             |                                 |                                        |                                 |                                           |                                 |
|----------------------------------------|------------------------------------------------------|---------------------------------|---------------------------------------------|---------------------------------|----------------------------------------|---------------------------------|-------------------------------------------|---------------------------------|
| Resources                              | Distributed randomly by autism organizations (N=113) |                                 | Parent requested a postal/PDF survey (N=90) |                                 | Parent downloaded survey online (N=15) |                                 | Parent took a survey at Autism Expo (N=4) |                                 |
|                                        | No. of Children                                      | Mean (range) number of contacts | No. of Children                             | Mean (range) number of contacts | No. of Children                        | Mean (range) number of contacts | No. of Children                           | Mean (range) number of contacts |
| <b>Dentist</b>                         | 54                                                   | 4.7 (1-12)                      | 37                                          | 3 (1-5)                         | 8                                      | 2.5 (1-4)                       | 3                                         | 2.5 (1-4)                       |
| <b>GP</b>                              | 56                                                   | 14.2 (1-50)                     | 29                                          | 6.2 (1-13)                      | 8                                      | 16.3 (1-40)                     | 2                                         | 1.5 (1-2)                       |
| <b>Practice Nurse</b>                  | 9                                                    | 12.6 (1-52)                     | 3                                           | 3.3 (1-6)                       | 1                                      | 4 (4)                           | 0                                         | -                               |
| <b>Optician</b>                        | 19                                                   | 4.8 (1-12)                      | 16                                          | 1.5 (1-2)                       | 5                                      | 1 (1)                           | 0                                         | -                               |
| <b>Dietician</b>                       | 9                                                    | 3.3 (1-6)                       | 8                                           | 1.5 (1-2)                       | 1                                      | 4(4)                            | 1                                         | 1(1)                            |
| <b>Speech &amp; Language therapist</b> | 38                                                   | 8.9 (1-30)                      | 37                                          | 6.6 (1-14)                      | 2                                      | 1.5 (1-2)                       | 2                                         | 6 (2-10)                        |
| <b>Occupational therapist</b>          | 43                                                   | 8.1 (1-24)                      | 28                                          | 4.1 (1-8)                       | 3                                      | 3.3 (1-6)                       | 1                                         | 2 (2)                           |
| <b>Physiotherapist</b>                 | 23                                                   | 7.4 (1-24)                      | 11                                          | 3 (1-5)                         | 1                                      | 18 (18)                         | 0                                         | -                               |
| <b>ABA</b>                             | 6                                                    | 8 (1-24)                        | 2                                           | (5-150)                         | 0                                      | -                               | 0                                         | -                               |
| <b>Sensory integration therapy</b>     | 2                                                    | 2 (1-3)                         | 1                                           | 1 (1)                           | 1                                      | 1 (1)                           | 0                                         | -                               |
| <b>CBT</b>                             | 3                                                    | 11.3 (2-24)                     | 1                                           | 12 (12)                         | 0                                      | -                               | 0                                         | -                               |
| <b>Play therapy</b>                    | 2                                                    | 3.5 (1-6)                       | 0                                           | -                               | 0                                      | -                               | 0                                         | -                               |
| <b>Psychiatrist</b>                    | 21                                                   | 7.1 (1-20)                      | 12                                          | 7.4 (1-25)                      | 0                                      | -                               | 0                                         | -                               |
| <b>Psychologist</b>                    | 25                                                   | 4.9 (1-10)                      | 14                                          | 4.7 (1-12)                      | 3                                      | 10.7 (4-17)                     | 0                                         | -                               |
| <b>Social worker</b>                   | 15                                                   | (1-9)                           | 7                                           | (1-2)                           | 1                                      | 8 (8)                           | 1                                         | 1 (1)                           |

Table S7: Continued

|                              | Recruitment method of surveys returned               |                                 |                                             |                                 |                                        |                                 |                                           |                                 |
|------------------------------|------------------------------------------------------|---------------------------------|---------------------------------------------|---------------------------------|----------------------------------------|---------------------------------|-------------------------------------------|---------------------------------|
| Resources                    | Distributed randomly by autism organizations (N=113) |                                 | Parent requested a postal/PDF survey (N=90) |                                 | Parent downloaded survey online (N=15) |                                 | Parent took a survey at Autism Expo (N=4) |                                 |
|                              | No. of Children                                      | Mean (range) number of contacts | No. of Children                             | Mean (range) number of contacts | No. of Children                        | Mean (range) number of contacts | No. of Children                           | Mean (range) number of contacts |
| Behavioural therapist        | 4                                                    | 9.7 (1-24)                      | 2                                           | 3 (2-4)                         | 0                                      | -                               | 0                                         | -                               |
| Neurologist                  | 8                                                    | 7.7 (1-20)                      | 3                                           | 1.5 (1-2)                       | 3                                      | 2 (1-3)                         | 0                                         | -                               |
| Gastroenterologist           | 5                                                    | 7 (1-20)                        | 1                                           | 1 (1)                           | 1                                      | 1 (1)                           | 0                                         | -                               |
| Accident & Emergency         | 10                                                   | 4.9 (1-10)                      | 10                                          | 2 (1-3)                         | 5                                      | 5.3 (1-10)                      | 0                                         | -                               |
| Social skills training/group | 7                                                    | 13.8 (2-40)                     | 5                                           | 4.4 (2-8)                       | 0                                      | -                               | 0                                         | -                               |
| Paediatrician                | 3                                                    | 1.5 (1-2)                       | 4                                           | 2.3 (1-4)                       | 0                                      | -                               | 0                                         | -                               |
| Hanen Programme              | 0                                                    | -                               | 1                                           | 4 (4)                           | 0                                      | -                               | 0                                         | -                               |
| Childcare worker             | 0                                                    | -                               | 1                                           | 6 (6)                           | 0                                      | -                               | 0                                         | -                               |
| Podiatrist                   | 0                                                    | -                               | 1                                           | 1 (1)                           | 0                                      | -                               | 0                                         | -                               |
| Development clinic           | 0                                                    | -                               | 0                                           | -                               | 1                                      | 3 (3)                           | 0                                         | -                               |
| Maxifacial OPD               | 1                                                    | 2 (2)                           | 0                                           | -                               | 0                                      | -                               | 0                                         | -                               |
| Urologist                    | 0                                                    | -                               | 1                                           | 1 (1)                           | 0                                      | -                               | 0                                         | -                               |
| Ophthalmology                | 0                                                    | -                               | 1                                           | 1 (1)                           | 0                                      | -                               | 0                                         | -                               |



**Table S8: State Educational Costs Stratified by Recruitment Method**

|                                                          | Recruitment method of surveys returned               |                                                            |           |                                             |                                                            |           |                                        |                                                            |           |                                           |                                                            |           |
|----------------------------------------------------------|------------------------------------------------------|------------------------------------------------------------|-----------|---------------------------------------------|------------------------------------------------------------|-----------|----------------------------------------|------------------------------------------------------------|-----------|-------------------------------------------|------------------------------------------------------------|-----------|
| Type of Expenses                                         | Distributed randomly by autism organizations (N=113) |                                                            |           | Parent requested a postal/PDF survey (N=90) |                                                            |           | Parent downloaded survey online (N=15) |                                                            |           | Parent took a survey at Autism Expo (N=4) |                                                            |           |
|                                                          | N                                                    | Unit Cost                                                  | Mean Cost | N                                           | Unit Cost                                                  | Mean Cost | N                                      | Unit Cost                                                  | Mean Cost | N                                         | Unit Cost                                                  | Mean Cost |
| Capitation Fees based on Type of School & ASD Unit Grant | 113                                                  | -                                                          | €490.84   | 90                                          | -                                                          | €515.35   | 15                                     | -                                                          | €818.22   | 4                                         | -                                                          | €756.92   |
| Pre-school/crèche                                        | 8                                                    | No extra cost                                              |           | 5                                           | No extra cost                                              |           | 0                                      | N/A                                                        |           | 0                                         | N/A                                                        |           |
| Special pre-school                                       | 4                                                    | No extra cost                                              |           | 5                                           | No extra cost                                              |           | 0                                      | N/A                                                        |           | 0                                         | N/A                                                        |           |
| Mainstream primary                                       | 40                                                   | No extra cost                                              |           | 30                                          | No extra cost                                              |           | 4                                      | No extra cost                                              |           | 0                                         | N/A                                                        |           |
| Special needs school                                     | 15                                                   | Depends on number of teachers in school                    |           | 11                                          | Depends on number of teachers in school                    |           | 0                                      | N/A                                                        |           | 1                                         | Depends on number of teachers in school                    |           |
| ASD unit                                                 | 26                                                   | Primary school - €1,753.33<br>Secondary school - €1,274.33 |           | 27                                          | Primary school - €1,753.33<br>Secondary school - €1,274.33 |           | 7                                      | Primary school - €1,753.33<br>Secondary school - €1,274.33 |           | 2                                         | Primary school - €1,753.33<br>Secondary school - €1,274.33 |           |
| Mainstream secondary                                     | 6                                                    | No extra cost                                              |           | 6                                           | No extra cost                                              |           | 4                                      | No extra cost                                              |           | 0                                         | N/A                                                        |           |
| Home educated by parents                                 | 1                                                    | No extra cost                                              |           | 1                                           | No extra cost                                              |           | 0                                      | N/A                                                        |           | 0                                         | N/A                                                        |           |
| Private school                                           | 0                                                    | N/A                                                        |           | 1                                           | No extra cost                                              |           | 0                                      | N/A                                                        |           | 0                                         | N/A                                                        |           |
| Day Centre                                               | 0                                                    | N/A                                                        |           | 1                                           | N/A                                                        |           | 0                                      | N/A                                                        |           | 0                                         | N/A                                                        |           |
| Not attending anywhere                                   | 1                                                    | N/A                                                        |           | 0                                           | N/A                                                        |           | 0                                      | N/A                                                        |           | 1                                         | N/A                                                        |           |
| Mainstream primary & special needs school                | 0                                                    | N/A                                                        |           | 1                                           | No extra cost                                              |           | 0                                      | N/A                                                        |           | 0                                         | N/A                                                        |           |
| Pre-school/crèche & Special pre-school                   | 2                                                    | No extra cost                                              |           | 0                                           | No extra cost                                              |           | 0                                      | N/A                                                        |           | 0                                         | N/A                                                        |           |
| Pre-school/crèche & ASD unit                             | 1                                                    | Primary school - €670                                      |           | 0                                           | N/A                                                        |           | 0                                      | N/A                                                        |           | 0                                         | N/A                                                        |           |
| Mainstream primary & Special needs school                | 1                                                    | No extra cost                                              |           | 0                                           | N/A                                                        |           | 0                                      | N/A                                                        |           | 0                                         | N/A                                                        |           |

Table S8: Continued

| Type of Expenses                                                    | Recruitment method of surveys returned               |                                                        |            |                                             |                                                        |            |                                        |           |            |                                           |           |            |
|---------------------------------------------------------------------|------------------------------------------------------|--------------------------------------------------------|------------|---------------------------------------------|--------------------------------------------------------|------------|----------------------------------------|-----------|------------|-------------------------------------------|-----------|------------|
|                                                                     | Distributed randomly by autism organizations (N=113) |                                                        |            | Parent requested a postal/PDF survey (N=90) |                                                        |            | Parent downloaded survey online (N=15) |           |            | Parent took a survey at Autism Expo (N=4) |           |            |
|                                                                     | N                                                    | Unit Cost                                              | Mean Cost  | N                                           | Unit Cost                                              | Mean Cost  | N                                      | Unit Cost | Mean Cost  | N                                         | Unit Cost | Mean Cost  |
| <b>Capitation Fees based on Type of School &amp; ASD Unit Grant</b> |                                                      |                                                        |            |                                             |                                                        |            |                                        |           |            |                                           |           |            |
| Mainstream primary & ASD unit                                       | 5                                                    | Primary school - €1,753.33                             |            | 0                                           | N/A                                                    |            | 0                                      | N/A       |            | 0                                         | N/A       |            |
| ASD unit & Home educated by parents                                 | 1                                                    | Primary school - €1,753.33                             |            | 0                                           | N/A                                                    |            | 0                                      | N/A       |            | 0                                         | N/A       |            |
| Mainstream secondary & Home educated by parents                     | 0                                                    | N/A                                                    |            | 1                                           | No extra cost                                          |            | 0                                      | N/A       |            | 0                                         | N/A       |            |
| N/A                                                                 | 1                                                    |                                                        |            | 0                                           |                                                        |            | 0                                      |           |            | 0                                         |           |            |
| Refusal                                                             | 1                                                    |                                                        |            | 1                                           |                                                        |            | 0                                      |           |            | 0                                         |           |            |
| <b>Special Needs Assistant</b>                                      | 80                                                   | €18.40 pH                                              | €12,162.90 | 60                                          | €18.40 pH                                              | €11,709.24 | 11                                     | €18.40 pH | €10,067.44 | 3                                         | €18.40 pH | €21,408.4  |
| <b>Resource hours</b>                                               | 1                                                    | Primary School - €34.50 pH<br>Post Primary - €41.65 pH | €26.78     | 2                                           | Primary School - €34.50 pH<br>Post Primary - €41.65 pH | €62.56     | -                                      | N/A       | -          | -                                         | N/A       | -          |
| <b>Home Tuition Grant</b>                                           | 4                                                    | €36.03 pH                                              | €790.43    | 4                                           | €1,007.24                                              | -          | -                                      | -         | -          | -                                         | N/A       | -          |
| <b>July Provision Grant (home based only)</b>                       | 50                                                   | €36.03 pH                                              | €637.70    | 25                                          | €36.03 pH                                              | €376.31    | 5                                      | €36.03 pH | €480.40    | -                                         | N/A       | -          |
| <b>Special Assistive Technology</b>                                 | 6                                                    |                                                        | €32.76     | 4                                           |                                                        | €29.33     | 1                                      |           | €44.00     | -                                         | N/A       | -          |
| <b>Educational Psychologist</b>                                     | 2                                                    | €47.97 pH                                              | €2.12      | 1                                           | €47.97 pH                                              | €1.07      | -                                      | N/A       | -          | -                                         | N/A       | -          |
| <b>Total State Educational Expenditure</b>                          | 101                                                  |                                                        | €13,107.56 | 71                                          |                                                        | €12,521.75 | 14                                     |           | €10,397.3  | 3                                         |           | €21,408.40 |

*Note:* In order to calculate the extra cost of educating a child with an ASD, the mainstream capitation grant of €170 paid for every child regardless of having special needs, was deducted from the €840 grant received from the State per child attending an ASD unit in a Primary school. Furthermore, the calculations include a once-off ASD unit set up grant worth €6,500 allocated towards the cost of furniture and general equipment. 6 children with an ASD are allocated per ASD unit class, therefore the cost per child amounts to €1,083.33. The State pays a capitation grant of €191 for each adolescent attending an ASD unit in post-primary Schools. This does not include the mainstream grant. Similarly, a once-off ASD unit set up grant of €6,500 is paid to post-primary schools. All educational unit costs were obtained from the Special Education Section in the Department of Education and Skills (Mulkerrins J, 23 August 2017, personal communication) apart from Special assistive technology costs sourced from Currys (2017a), Currys (2017b), and Dell (2017).

**Table S9: Average Indirect Costs for Parents in Paid Employment Per Household (N=195)**

|                                                                                                                                | Recruitment method of surveys returned               |           |           |                                             |           |           |                                        |           |           |                                           |      |       |
|--------------------------------------------------------------------------------------------------------------------------------|------------------------------------------------------|-----------|-----------|---------------------------------------------|-----------|-----------|----------------------------------------|-----------|-----------|-------------------------------------------|------|-------|
|                                                                                                                                | Distributed randomly by autism organizations (N=113) |           |           | Parent requested a postal/PDF survey (N=90) |           |           | Parent downloaded survey online (N=15) |           |           | Parent took a survey at Autism Expo (N=4) |      |       |
|                                                                                                                                | N                                                    | Mean      | Range     | N                                           | Mean      | Range     | N                                      | Mean      | Range     | N                                         | Mean | Range |
| <i>Mothers still in paid employment</i>                                                                                        |                                                      |           |           |                                             |           |           |                                        |           |           |                                           |      |       |
| <b>Had to Take Time Off Work Because of Their Child's Condition</b>                                                            |                                                      |           |           |                                             |           |           |                                        |           |           |                                           |      |       |
| Yes                                                                                                                            | 30                                                   |           |           | 19                                          |           |           | 1                                      |           |           | 1                                         |      |       |
| No                                                                                                                             | 3                                                    |           |           | 3                                           |           |           | 4                                      |           |           | 0                                         |      |       |
| Refusal                                                                                                                        | 1                                                    |           |           | 0                                           |           |           | 1                                      |           |           | 0                                         |      |       |
| <b>Number of Days Taken Off From Paid Work In the Past 12 Months</b>                                                           | 27                                                   | 24        | (1-104)   | 17                                          | 33.65     | 1-114     | 4                                      | 57        | (2-104)   | 1                                         | 7    | 7     |
| <b>Reported Estimated Loss in Income from Taking Time Off Work Or Working Reduced Hours Because of Their Child's Condition</b> | 20                                                   | €4,063.53 | €0-60,000 | 14                                          | €3,876.36 | €0-20,800 | 3                                      | €5,333.33 | €0-20,000 | 0                                         | €0   | €0    |
| <b>Had to Turn Down Work Opportunities or a Promotion Because of Their Child's Condition (<i>All Mothers</i>)</b>              |                                                      |           |           |                                             |           |           |                                        |           |           |                                           |      |       |
| Yes                                                                                                                            | 61                                                   |           |           | 55                                          |           |           | 8                                      |           |           | 1                                         |      |       |
| No                                                                                                                             | 17                                                   |           |           | 12                                          |           |           | 0                                      |           |           | 1                                         |      |       |
| N/A                                                                                                                            | 4                                                    |           |           | 6                                           |           |           | 1                                      |           |           | 0                                         |      |       |
| Refusal                                                                                                                        | 17                                                   |           |           | 7                                           |           |           | 3                                      |           |           | 2                                         |      |       |

Table S9: Continued

|                                                                                                                                | Recruitment method of surveys returned               |           |           |                                             |         |           |                                        |        |           |                                           |      |        |
|--------------------------------------------------------------------------------------------------------------------------------|------------------------------------------------------|-----------|-----------|---------------------------------------------|---------|-----------|----------------------------------------|--------|-----------|-------------------------------------------|------|--------|
|                                                                                                                                | Distributed randomly by autism organizations (N=113) |           |           | Parent requested a postal/PDF survey (N=90) |         |           | Parent downloaded survey online (N=15) |        |           | Parent took a survey at Autism Expo (N=4) |      |        |
|                                                                                                                                | N                                                    | Mean      | Range     | N                                           | Mean    | Range     | N                                      | Mean   | Range     | N                                         | Mean | Range  |
| <i>Fathers still in paid employment</i>                                                                                        |                                                      |           |           |                                             |         |           |                                        |        |           |                                           |      |        |
| <b>Had to Take Time Off Work Because of Their Child's Condition</b>                                                            |                                                      |           |           |                                             |         |           |                                        |        |           |                                           |      |        |
| Yes                                                                                                                            | 39                                                   |           |           | 34                                          |         |           | 5                                      |        |           | 3                                         |      |        |
| No                                                                                                                             | 21                                                   |           |           | 18                                          |         |           | 2                                      |        |           | 1                                         |      |        |
| N/A                                                                                                                            | 0                                                    |           |           | 0                                           |         |           | 1                                      |        |           | 0                                         |      |        |
| Refusal                                                                                                                        | 4                                                    |           |           | 3                                           |         |           | 0                                      |        |           | 0                                         |      |        |
| <b>Number of Days Taken Off From Paid Work In the Past 12 Months</b>                                                           | 36                                                   | 13.03     | 2-100     | 33                                          | 8.91    | 2-52      | 3                                      | 21.33  | 14-30     | 2                                         | 4.5  | 3-6    |
| <b>Reported Estimated Loss in Income from Taking Time Off Work Or Working Reduced Hours Because of Their Child's Condition</b> | 23                                                   | €1,746.31 | €0-40,000 | 19                                          | €913.82 | €0-15,000 | 4                                      | €1,375 | €0- 3,000 | 1                                         | €60  | €0-240 |
| <b>Had to Turn Down Work Opportunities or a Promotion Because of Their Child's Condition (All Fathers)</b>                     |                                                      |           |           |                                             |         |           |                                        |        |           |                                           |      |        |
| Yes                                                                                                                            | 26                                                   |           |           | 19                                          |         |           | 3                                      |        |           | 0                                         |      |        |
| No                                                                                                                             | 24                                                   |           |           | 33                                          |         |           | 5                                      |        |           | 2                                         |      |        |
| N/A                                                                                                                            | 18                                                   |           |           | 3                                           |         |           | 1                                      |        |           | 0                                         |      |        |
| Refusal                                                                                                                        | 31                                                   |           |           | 25                                          |         |           | 3                                      |        |           | 2                                         |      |        |

*Note:* The estimates for reported loss in income are based on parents who are still in paid employment, but had to take some days off. They do not include the loss of income for full-time carers who had to give up paid employment to care for their child's special needs. Mean and ranges are based on the sub-sample effected.

**Table S10: Average Indirect Costs for Parents in Paid Employment Per Child**

|                                                                                                                                | Recruitment method of surveys returned               |           |           |                                             |           |           |                                        |           |           |                                           |      |        |
|--------------------------------------------------------------------------------------------------------------------------------|------------------------------------------------------|-----------|-----------|---------------------------------------------|-----------|-----------|----------------------------------------|-----------|-----------|-------------------------------------------|------|--------|
|                                                                                                                                | Distributed randomly by autism organizations (N=113) |           |           | Parent requested a postal/PDF survey (N=90) |           |           | Parent downloaded survey online (N=15) |           |           | Parent took a survey at Autism Expo (N=4) |      |        |
|                                                                                                                                | N                                                    | Mean      | Range     | N                                           | Mean      | Range     | N                                      | Mean      | Range     | N                                         | Mean | Range  |
| <i>Mothers still in paid employment</i>                                                                                        |                                                      |           |           |                                             |           |           |                                        |           |           |                                           |      |        |
| <b>Reported Estimated Loss in Income from Taking Time Off Work Or Working Reduced Hours Because of Their Child's Condition</b> | 22                                                   | €3,635.79 | €0-60,000 | 15                                          | €3,707.83 | €0-20,800 | 3                                      | €5,333.33 | €0-20,000 | 0                                         | 0    | 0      |
| <i>Fathers still in paid employment</i>                                                                                        |                                                      |           |           |                                             |           |           |                                        |           |           |                                           |      |        |
| <b>Reported Estimated Loss in Income from Taking Time Off Work Or Working Reduced Hours Because of Their Child's Condition</b> | 27                                                   | €1490.19  | €0-40,000 | 21                                          | €851.86   | €0-15,000 | 6                                      | €1,000    | €0-3,000  | 1                                         | €60  | €0-240 |

Note: 68 children had mothers in paid employment and 149 children had fathers in paid employment. Mean costs and ranges are based on the sub-sample of parents in paid employment. Mother's mean loss in income on a per child basis is €1,150.63 and Father's mean loss in income on a per child basis is €780.47

**Table S11: Informal care provided by parents who are full-time carers based on a typical 24 hour day/night N= 128 children**

| <b>Caregiver activity</b>                                                  |          |                        |              |
|----------------------------------------------------------------------------|----------|------------------------|--------------|
| <b>Caregiver activity</b>                                                  | <b>N</b> | <b>Mean hours mins</b> | <b>Range</b> |
| <b>Personal Care</b>                                                       |          |                        |              |
| Feeding                                                                    | 87       | 1.47                   | 2.4 – 24.00  |
| Dressing                                                                   | 103      | 0.55                   | 4.2-24.00    |
| Personal hygiene                                                           | 106      | 1.01                   | 2.4-24.00    |
| Administrating medication                                                  | 55       | 44.4                   | 0.01-24.00   |
| Attend to your child/children with an ASD at night                         | 90       | 2.17                   | .10-12.00    |
| Practical help                                                             | 85       | 4.02                   | .10-24.00    |
| <b>Communicating/Therapies</b>                                             |          |                        |              |
| Social & life skills e.g. helping your child to get used of new situations | 71       | 4.14                   | 0.07-24.00   |
| Speech and occupational therapy                                            | 68       | 1.39                   | 0.15-12.00   |
| iPad interaction                                                           | 75       | 1.28                   | 0.05-12.00   |
| Play therapy                                                               | 59       | 1.41                   | 0.06-12.00   |
| Applied behavioural analysis techniques                                    | 31       | 6.01                   | 0.05-24.00   |
| Music therapy                                                              | 23       | 1.47                   | 0.10-24.00   |
| <b>Helping with homework</b>                                               | 62       | 1.05                   | 0.07-3.00    |
| <b>Behavioural management</b>                                              | 32       | 6.43                   | 0.15-24.00   |
| Dealing with meltdowns                                                     | 86       | 3.14                   | 0.04-24.00   |
| Anxiety issues                                                             | 80       | 3.16                   | 0.08-24.00   |
| <b>Supervision</b>                                                         |          |                        |              |
| Making sure your child/children with an ASD are safe                       | 113      | 13.03                  | 0.15-24.00   |
| Keeping company                                                            | 86       | 7.52                   | 0.20-24.00   |
| <b>Appointments</b>                                                        |          |                        |              |
| Bringing your child to appointments                                        | 62       | 1.19                   | 0.10-6.00    |
| Bringing your child to ASD friendly activities                             | 59       | 1.25                   | 0.07-5.00    |
| <b>Transportation</b>                                                      |          |                        |              |
| The amount of time spent bringing                                          | 56       | 1.22                   | 0.15-9.00    |
| <b>Other</b>                                                               |          |                        |              |
| Physio activities                                                          | 1        | 0.22                   | 0.22         |
| Sensory integration therapy activities                                     | 2        | 2.53                   | 0.45-5.00    |
| Anti-stress exercises                                                      | 1        | 0.30                   | 0.30         |
| Autism studies                                                             | 1        | 4.00                   | 4.00         |
| Dressing wounds from picking skin                                          | 1        | 0.45                   | 0.45         |
| Re-directing obsessional behaviour                                         | 1        | 14.00                  | 14.00        |

**Table S12: Informal Care Costs for Child who are full-time carers**

|                                                                     |                                                                                      |
|---------------------------------------------------------------------|--------------------------------------------------------------------------------------|
| <b>Mothers</b><br>101 mothers of 120 children are full-time carers) | Industrial wage per hour (CSO, 2014) €17.76<br>Assuming an 8 hour day, 5 days a week |
| Annual mean cost per child for sub-sample of 120 children           | €30,937.92                                                                           |
| Annual mean cost per child for 222 children                         | €16,723.2                                                                            |
| <b>Fathers</b> (13 children children have fathers full-time carers) | Industrial wage per hour (CSO, 2014) €21.69                                          |
| Annual mean cost per child for sub-sample of 120 children           | €2,7763.2                                                                            |
| Annual mean cost per child for 222 children                         | €1,625.77                                                                            |

*Note:* Measuring the informal care costs of children with an ASD presents many challenges. Most parents stated in their survey responses that they spent 24 hours per day supervising and keeping their ASD child safe given the nature of the condition and the need for parents to be extra vigilant and ready for action when situations arise. While parents of children with an ASD have considerable time costs associated with caring for their child's extra needs, it can be difficult to measure informal care hours as parents have a duty of care towards typically developing children based on their needs and safety. Therefore, it was considered appropriate to assume 8 hours of informal care per day was provided by all parents who reported they were full-time carers for their child/children with an ASD.

**Table S13: Comorbidity Count for ASD Sample (N=222)**

| Comorbidity Count | N  | %     |
|-------------------|----|-------|
| 0                 | 33 | 14.86 |
| 1                 | 65 | 29.28 |
| 2                 | 52 | 23.42 |
| 3                 | 40 | 18.02 |
| 4                 | 15 | 6.76  |
| 5                 | 8  | 3.60  |
| 6                 | 4  | 1.80  |
| 7                 | 3  | 1.35  |
| 8                 | -  | -     |
| 9                 | 2  | 0.90  |

**Table S14: Prevalence of Comorbidities within ASD Sample (N=222)**

| Type of Comorbidity                      | N  | %     | Type of Comorbidity                   | N  | %     |
|------------------------------------------|----|-------|---------------------------------------|----|-------|
| Allergies                                | 9  | 4.05  | Hypotonia                             | 4  | 1.80  |
| Anorectal malformation                   | 1  | 0.45  | Incontinence                          | 1  | 0.45  |
| Anxiety                                  | 52 | 23.42 | Intellectual disability               |    |       |
| Asthma                                   | 11 | 4.95  | Juvenile arthritis                    | 2  | 0.90  |
| Attention deficit disorder               | 2  | 0.90  | Learning difficulty/disability        | 3  | 1.35  |
| Attention deficit hyperactivity disorder | 33 | 14.86 | Liver transplant                      | 1  | 0.45  |
| Bronchiolitis                            | 1  | 0.45  | Muscular pains                        | 1  | 0.45  |
| Cerebral palsy                           | 2  | 0.90  | Neurofibromatosis type I              | 3  | 1.35  |
| Chiari malformation                      | 1  | 0.45  | Obsessive-compulsive disorder         | 6  | 2.70  |
| Coeliac                                  | 1  | 0.45  | Oculofaciocardiodental syndrome       | 1  | 0.45  |
| Congenital hypothyroidism                | 1  | 0.45  | Oppositional defiant disorder         | 13 | 5.86  |
| Cranial surgery                          | 1  | 0.45  | Pathological demand avoidance         | 1  | 0.45  |
| Crohn's disease                          | 1  | 0.45  | Peg fed                               | 1  | 0.45  |
| Depression                               | 3  | 1.35  | Petit Mal Epilepsy                    | 2  | 0.90  |
| Diabetes (Type 1)                        | 1  | 0.45  | Reflux                                | 2  | 0.90  |
| Down syndrome                            | 3  | 1.35  | Respiratory                           | 1  | 0.45  |
| Duodenal ulcer                           | 1  | 0.45  | Restless leg syndrome                 | 1  | 0.45  |
| Dyscalculia                              | 2  | 0.90  | Rhinitis                              | 1  | 0.45  |
| Dyslexia                                 | 7  | 3.15  | Sensory problems                      | 5  | 2.25  |
| Dyspraxia                                | 13 | 5.86  | Sensory Processing Disorder           | 11 | 4.95  |
| Eczema                                   | 6  | 2.70  | Skin picking disorder                 | 1  | 0.45  |
| Emotional & behavioural disorders        | 1  | 0.45  | Skin rashes                           | 2  | 0.90  |
| Eneuresis                                | 2  | 0.90  | Sleep apnea                           | 2  | 0.90  |
| Eosinophilic esophagitis                 | 1  | 0.45  | Sleep problems/disorders              | 38 | 17.12 |
| Epilepsy                                 | 6  | 2.70  | Specific speech & language impairment | 2  | 0.90  |
| Febrile convulsions                      | 1  | 0.45  | Spinal curvature                      | 1  | 0.45  |
| Feeding difficulty                       | 2  | 0.90  | Tumours                               | 1  | 0.45  |
| Finger deformity                         | 1  | 0.45  | Vision problem                        | 1  | 0.45  |
| Food sensitivity/intolerance             | 3  | 1.35  | Vitamin deficiency                    | 1  | 0.45  |
| Fragile X syndrome                       | 1  | 0.45  |                                       |    |       |
| Gastrointestinal issues                  | 38 | 17.12 |                                       |    |       |
| Glaucoma                                 | 1  | 0.45  |                                       |    |       |
| Global development delay                 | 3  | 1.35  |                                       |    |       |
| Hayfever                                 | 1  | 0.45  |                                       |    |       |
| Hearing problem                          | 1  | 0.45  |                                       |    |       |
| Heart problem                            | 3  | 1.35  |                                       |    |       |
| Hemiparesis                              | 1  | 0.45  |                                       |    |       |
| Hernia                                   | 1  | 0.45  |                                       |    |       |
| Hypermobility                            | 7  | 3.15  |                                       |    |       |

*Note:* The comorbidity list is based on Question 4, Section of the national ASD survey “Does your child also have another medical condition(s) e.g. epilepsy, ADHD, anxiety disorders, sleep disorders, gastrointestinal problems: Yes/No. If Yes, please specify.



**Table S15: Average Marginal Effects of GLM Out-of-Pocket Expenditure Per Child and State health expenditure (Without Equivalised Household Income)**

| <b>Coefficients</b>                             | <b>Model 1<br/>(Out-of-pocket<br/>expenditure)</b> | <b>Model 2<br/>(State health<br/>expenditure)</b> |
|-------------------------------------------------|----------------------------------------------------|---------------------------------------------------|
| <b>Severity of ASD</b>                          |                                                    |                                                   |
| Level 1 Mild                                    | REF                                                | REF                                               |
| Level 2 Moderate                                | 2398.489**<br>(1001.102)                           | -541.40**<br>(261.28)                             |
| Level 3 Severe                                  | 3697.211*<br>(2111.826)                            | 7.64<br>(547.65)                                  |
| <b>Intellectual disability</b>                  | -1533.72<br>(1092.07)                              | 15.44<br>(258.80)                                 |
| <b>Gender (Male)</b>                            | -159.5263<br>(1332.828)                            | -490.04<br>(379.03)                               |
| <b>Medical card</b>                             | -2564.409**<br>(1019.512)                          | 650.93**<br>(271.19)                              |
| <b>Comorbidity count</b>                        | 1066.856***<br>(365.5952)                          | 287.71***<br>(110.98)                             |
| <b>Mother – third level education or higher</b> | 1504.411<br>(1117.138)                             | -291.43<br>(244.98)                               |
| <b>Rural</b>                                    | 1944.752*<br>(1025.552)                            | 686.77**<br>(287.64)                              |
| AIC                                             | 20.08563                                           | 16.10531                                          |
| BIC                                             | -791.3697                                          | -697.6285                                         |
| Log Pseudo likelihood                           | -1798.706481                                       | -1440.477597                                      |
| N                                               | 180                                                | 180                                               |

\*\*\*denotes significant at 1%, \*\* denotes significant at 5%, \* denotes significant at 10%

### *Sensitivity Analysis*

Outliner expenditure for GP services and Practice Nurse was excluded in the State health expenditure model, resulting in the variable for mothers who have a third level education or higher variable becoming statistically significant at a 5% level.

**Table S16: Average Marginal Effects of GLM Out-of-Pocket Expenditure Per Child and State health expenditure (Sensitivity Analysis)**

| <b>Coefficients</b>                             | <b>Model 1<br/>(Out-of-pocket<br/>expenditure)</b> | <b>Model 2<br/>(State health<br/>expenditure)<sup>a</sup></b> |
|-------------------------------------------------|----------------------------------------------------|---------------------------------------------------------------|
| <b>Severity of ASD</b>                          |                                                    |                                                               |
| Level 1 Mild                                    | REF                                                | REF                                                           |
| Level 2 Moderate                                | 3134.69**<br>(1383.07)                             | -199.95<br>(204.12)                                           |
| Level 3 Severe                                  | 4170.22<br>(2993.39)                               | 810.80<br>(823.05)                                            |
| <b>Intellectual disability</b>                  | -412.64<br>(1494.99)                               | -244.45<br>(221.39)                                           |
| <b>Gender (Male)</b>                            | -1759.65<br>(2036.77)                              | -129.67<br>(285.51)                                           |
| <b>Medical card</b>                             | -2895.61*<br>(1577.57)                             | 425.90*<br>(254.19)                                           |
| <b>Equivalised disposable HH income</b>         | 0.075<br>(0.113)                                   | 0.00036<br>(0.018)                                            |
| <b>Comorbidity count</b>                        | 1286.59***<br>(462.42)                             | 108.98**<br>54.256                                            |
| <b>Mother – third level education or higher</b> | 1920.917<br>(1613.796)                             | -675.30**<br>(285.48)                                         |
| <b>Rural</b>                                    | 1147.00<br>(1393.82)                               | 583.47**<br>(252.81)                                          |
| AIC                                             | 20.45876                                           | 15.59762                                                      |
| BIC                                             | -432.2919                                          | -380.1333                                                     |
| Log Pseudo likelihood                           | -1145.91982                                        | -855.6676486                                                  |
| N                                               | 113                                                | 111                                                           |

\*\*\*denotes significant at 1%, \*\* denotes significant at 5%, \* denotes significant at 10%

<sup>a</sup> Model based on the exclusion of observations that GP service utilization of 25 visits or higher and one observation which had 52 visits to a Practice nurse in the previous year.
